# Supplementary material
Source: publisher figshare collection journal article supplement (https://frontiersin.figshare.com/ndownloader/files/14869871)
Supplement: Supplementary file [file 14869871]

## Supplementary Data Sheet 1

### Membrane sphingolipids regulate the fitness and antifungal protein susceptibility of *Neurospora crassa*

Anna Huber<sup>1</sup>, Gregor Oemer<sup>2</sup>, Nermina Malanovic<sup>3</sup>, Karl Lohner<sup>3</sup>, Laura Kovács<sup>1</sup>, Willi Salvenmoser<sup>4</sup>, Johannes Zschocke<sup>2</sup>, Markus A. Keller<sup>2\*</sup> and Florentine Marx<sup>1\*</sup>

<sup>1</sup>Division of Molecular Biology, Biocenter, Medical University of Innsbruck, Innsbruck, Austria;

<sup>2</sup>Division of Human Genetics, Medical University of Innsbruck, Innsbruck, Austria; <sup>3</sup>Institute of Molecular Biosciences, Biophysics Division, University Graz, Graz, Austria; <sup>4</sup>Institute of Zoology, University of Innsbruck, Innsbruck, Austria.

**Running title:** Sphingolipids of *Neurospora crassa*

**Key words:** sphingolipids, glucosylceramide, lipidomics, *Neurospora crassa*, antimicrobial proteins, *Penicillium chrysogenum*

## Supplementary Methods

### Verification of GlcCer mutants by PCR

To verify the gene knockout in the mutant strains, a gene specific PCR-reaction was performed. Genomic DNA of all mutant strains was extracted according to Zadra et al. (2000) and used as template for PCR. Gene deletion was accomplished by the replacement of the gene with the hygromycin resistance (*hygR*) cassette (Park et al. 2011). To verify the presence of the *hygR* cassette, we used the primer *hygR*vf\_3f, which binds in the resistance gene *hygR* and the primer LAC-1vf\_3r, FGSC#15707\_3r, FGSC#16221\_3r, FGSC#13992\_3r or GCSvf\_3r, respectively (Supplementary Table S5). These latter primers bind to the 3'UTR region of the respective gene that was replaced by the resistance marker cassette. For the verification of the site-specific integration of the *hygR* cassette we used the primer pair LAC-1vf\_3r and Lac\_fw\_outs\_flank 5' for the  $\Delta lac$  mutant, the primer pair FGSC#15707\_3r and 15707\_fw\_outs\_flank5' for the  $\Delta des-1$  mutant, FGSC#16221\_3r and 16221\_fw\_outs\_flank5' for the  $\Delta des-2$  mutant, FGSC#13992\_3r and 13992\_fw\_outs\_flank5' for the  $\Delta smt$  mutant and GCSvf\_3r and GCS\_fw\_outs\_flank5' for  $\Delta gcs$  mutant. As controls we included the *wt* and the  $\Delta ku70$  strain.

### Northern analysis

*N. crassa wt*,  $\Delta ku70$  and  $\Delta smt$  were grown in liquid medium overnight at 25°C in shaking flasks and total RNA was extracted from the mycelium using TRI Reagent (Sigma-Aldrich). Ten  $\mu$ g of total RNA per lane were loaded on a 1.2% formaldehyde-agarose gel and blotted onto Hybond-N membranes (Amersham Biosciences). The primer pair Smt northern\_fw and Smt northern\_rev was used for PCR-based amplification of the *smt* gene specific hybridization probe labelled with digoxigenin (DIG) (Roche) (Supplementary Table S5).

### Lipid quantification

For total lipids quantification in extracts, a colorimetric adsorption method was used, modified from Cheng et al. (2011). The assay was performed in 96-well plates. A standard series from olive oil, diluted in chloroform:methanol (2:1), was prepared. Different volumes of the total lipid extracts and the standards were added to the wells in triplicates, respectively and dried for 15 min at 70°C. Subsequently 100  $\mu$ L 96% H<sub>2</sub>SO<sub>4</sub> (v/v) were added and samples were incubated for 20 min at 70°C. After cooling the microplate on ice, sample background adsorption was photometrically determined by measuring the OD<sub>540</sub> with a Fluostar Omega microplate reader (BMG Labtech). Then 50  $\mu$ L 17% phosphoric acid (v/v) containing 0.2 mg/mL vanillin were added and after 30 min incubation at 25°C, adsorption was determined again at 540 nm. Based

on the standard series, the lipid content of the extracts was calculated using Microsoft Excel 2010 software (Microsoft Corp.).

### **Microscopic imaging of *N. crassa* grown on solid medium**

Five  $\mu\text{L}$  of a  $2 \times 10^5/\text{mL}$  spore suspension of the *N. crassa wt* and mutant strains were dotted on Vogel's agar plates and incubated at 25°C. Images of the colony edges were taken after 24 h using an inverted Leica DM IL LED microscope (Leica Microsystems) combined with an AxioCam MR3 camera (Carl Zeiss GmbH) and processed with AxioVision software (Carl Zeiss GmbH).

### **Electron microscopy**

Samples for scanning electron microscopy (SEM) were prepared by dotting 5  $\mu\text{L}$  of a  $2 \times 10^5/\text{mL}$  spore suspension of the *N. crassa wt* strains and the  $\Delta lac$  and  $\Delta gcs$  mutants on Vogel's agar. Plates were incubated at 25°C for 72 h under continuous light. Samples were fixed with 2.5% glutaraldehyde in 0.1 M cacodylate buffer (pH 7.3) for 2 h to overnight at 4°C. After washing with buffer, samples were post-fixed with 1% osmium tetroxide in 0.05 M cacodylate buffer for 1-2 h at room temperature and rinsed with buffer. Representative pieces were cut out of the agar, dehydrated in increasing methanol concentrations, critical point dried and gold coated. Samples were examined with a ZEISS DSM 950 scanning electron microscope (Carl Zeiss GmbH) using 15 kV. Images were taken with a Pentax digital camera and gray scales were adjusted using Adobe Photoshop.

## Supplementary Tables

**Table S1. Media used in this study.**

| Culture medium      | Composition                                                                                                                                                                                                                                                                                                                    |
|---------------------|--------------------------------------------------------------------------------------------------------------------------------------------------------------------------------------------------------------------------------------------------------------------------------------------------------------------------------|
| Minimal medium (MM) | 0.3% NaNO <sub>3</sub> , 0.05% MgSO <sub>4</sub> × 7H <sub>2</sub> O, 0.05% KCl, 0.005% FeSO <sub>4</sub> × 7H <sub>2</sub> O, 2% D(+)-sucrose (w/v), 2.5% KPO <sub>4</sub> -buffer (1M, pH 5.8), 0.1% trace elements A (v/v)                                                                                                  |
| Trace elements A    | 0.1% FeSO <sub>4</sub> × 7H <sub>2</sub> O, 0.9% ZnSO <sub>4</sub> × 7H <sub>2</sub> O, 0.04% CuSO <sub>4</sub> × 5H <sub>2</sub> O, 0.01% MnSO <sub>4</sub> × H <sub>2</sub> O, 0.01% H <sub>3</sub> BO <sub>3</sub> , 0.01% Na <sub>2</sub> MoO <sub>4</sub> × 2H <sub>2</sub> O (w/v)                                       |
| Vogel's medium      | 2.0% salt solution (v/v), 2.0% D(+)-sucrose (w/v)                                                                                                                                                                                                                                                                              |
| Salt solution       | 15.0% sodium citrate, 25.0% KH <sub>2</sub> PO <sub>4</sub> , 10.0% NH <sub>4</sub> NO <sub>3</sub> , 1.0% MgSO <sub>4</sub> × 7H <sub>2</sub> O, 0.1% CaCl <sub>2</sub> (w/v), 0.10% trace elements B, 0.5 ng/mL biotin (w/v)                                                                                                 |
| Trace elements B    | 5.0% citric acid × H <sub>2</sub> O, 5.0% ZnSO <sub>4</sub> × 7H <sub>2</sub> O, 0.97% FeSO <sub>4</sub> × 7H <sub>2</sub> O, 0.25% CuSO <sub>4</sub> × 5H <sub>2</sub> O, 0.05% MnSO <sub>4</sub> × H <sub>2</sub> O, 0.05% H <sub>3</sub> BO <sub>3</sub> , 0.05% Na <sub>2</sub> MoO <sub>4</sub> × 2H <sub>2</sub> O (w/v) |



**Table S2. Equipment and parameters for HPLC and MS/MS analysis.**

| <b>HPLC: Dionex® Ultimate 3000</b> |                                                                                       | <b>MS: Thermo Scientific® LTQ Velos</b> |                                             |
|------------------------------------|---------------------------------------------------------------------------------------|-----------------------------------------|---------------------------------------------|
| Column                             | Agilent® Poroshell 120 RO<br>EC-C8                                                    | Source                                  | Electrospray<br>ionisation<br>Positive mode |
| Column oven<br>temperature         | 50°C                                                                                  | Capillary<br>temperature                | 275°C                                       |
| Sampler<br>temperature             | 10°C                                                                                  | Source voltage                          | 3.8 kV                                      |
| Mobile Phase A                     | 10 mM NH <sub>4</sub> COOH + 0.2%<br>CHCOOH in 60/40<br>Acetonitrile/H <sub>2</sub> O | Full MS mass range                      | 460-1650 (m/z)                              |
| Mobile Phase B                     | 10 mM NH <sub>4</sub> COOH + 0.2%<br>CHCOOH in 90/10<br>Isopropanol/Acetonitrile      | Scan rate/<br>Scan type                 | Normal/<br>Profile                          |
| Flow rate                          | 0.400 ml/min                                                                          | Activation type                         | CID                                         |
| Gradient                           | 40% for 2 min                                                                         | Isolation width                         | 1.0                                         |
|                                    | 40% to 74% in 20 min                                                                  | N. Collision energy                     | 38                                          |
|                                    | 74% to 99% in 30 sec                                                                  | Default charge state                    | 1                                           |
|                                    | 99% for 4 min                                                                         | Activation time                         | 10 ms                                       |
|                                    | 99%-62% in 30 sec                                                                     | MS2 mass range                          | 5–105% of m.o.p.                            |
|                                    | 40% for 1 min                                                                         | Microscans MS1                          | 3                                           |
| Sample loading                     | 20 µl loop                                                                            | Microscans MS2                          | 5                                           |
| Injection volume                   | 10 µl                                                                                 | Dynamic exclusion                       | enabled                                     |
| Wash volume                        | 200 µl                                                                                | Exclusion duration                      | 8 s                                         |

**Table S3. List of lipid species features included into the analysis.**

| Feature Name   | m.z    | RT (min) | Adduct             |
|----------------|--------|----------|--------------------|
| PE:28:0 (ISTD) | 636.48 | 2.7      | [M+H] <sup>+</sup> |
| PE:32:3        | 686.48 | 2.5      | [M+H] <sup>+</sup> |
| PE:32:2        | 688.49 | 3.1      | [M+H] <sup>+</sup> |
| PE:32:1        | 690.51 | 3.8      | [M+H] <sup>+</sup> |
| PE:32:0        | 692.52 | 4.7      | [M+H] <sup>+</sup> |
| PE:34:4        | 712.49 | 2.65     | [M+H] <sup>+</sup> |
| PE:34:3        | 714.51 | 3.3      | [M+H] <sup>+</sup> |
| PE:34:2        | 716.52 | 4.05     | [M+H] <sup>+</sup> |
| PE:34:1        | 718.54 | 5        | [M+H] <sup>+</sup> |
| PE:36:6        | 736.49 | 2.3      | [M+H] <sup>+</sup> |
| PE:36:5        | 738.51 | 2.8      | [M+H] <sup>+</sup> |
| PE:36:4        | 740.52 | 3.2      | [M+H] <sup>+</sup> |
| PE:36:3        | 742.54 | 4.2      | [M+H] <sup>+</sup> |
| PE:36:2        | 744.55 | 5.25     | [M+H] <sup>+</sup> |
| PC:28:0 (ISTD) | 678.5  | 2.55     | [M+H] <sup>+</sup> |
| PC:32:3        | 728.52 | 2.4      | [M+H] <sup>+</sup> |
| PC:32:2        | 730.54 | 2.9      | [M+H] <sup>+</sup> |
| PC:32:1        | 732.55 | 3.65     | [M+H] <sup>+</sup> |
| PC:34:5        | 752.52 | 2.05     | [M+H] <sup>+</sup> |
| PC:34:4        | 754.54 | 2.5      | [M+H] <sup>+</sup> |
| PC:34:3        | 756.55 | 3.05     | [M+H] <sup>+</sup> |
| PC:34:2        | 758.57 | 3.8      | [M+H] <sup>+</sup> |
| PC:34:1        | 760.59 | 4.7      | [M+H] <sup>+</sup> |
| PC:36:6        | 778.54 | 2.15     | [M+H] <sup>+</sup> |
| PC:36:5        | 780.55 | 2.6      | [M+H] <sup>+</sup> |
| PC:36:4        | 782.57 | 3.2      | [M+H] <sup>+</sup> |
| PC:36:3        | 784.59 | 4        | [M+H] <sup>+</sup> |
| PC:36:2        | 786.6  | 5        | [M+H] <sup>+</sup> |
| PC:36:1        | 788.62 | 6.05     | [M+H] <sup>+</sup> |
| PC:38:6        | 806.57 | 2.75     | [M+H] <sup>+</sup> |
| PC:38:5        | 808.59 | 3.35     | [M+H] <sup>+</sup> |
| PC:38:4        | 810.6  | 4.15     | [M+H] <sup>+</sup> |

|               |        |      |                                     |
|---------------|--------|------|-------------------------------------|
| PC:38:3       | 812.62 | 5.15 | [M+H] <sup>+</sup>                  |
| PC:38:2       | 814.63 | 6.25 | [M+H] <sup>+</sup>                  |
| PI:34:1       | 837.51 | 3.7  | [M+H] <sup>+</sup>                  |
| PI:34:2       | 835.51 | 2.95 | [M+H] <sup>+</sup>                  |
| PI:34:3       | 833.41 | 2.4  | [M+H] <sup>+</sup>                  |
| PI:36:4       | 859.51 | 2.5  | [M+H] <sup>+</sup>                  |
| PI:36:5       | 857.51 | 2.1  | [M+H] <sup>+</sup>                  |
| Cer:36:2      | 564.54 | 5.5  | [M+H] <sup>+</sup>                  |
| Cer:36:2      | 546.54 | 5.5  | [M-H <sub>2</sub> O+H] <sup>+</sup> |
| Cer:36:1      | 566.55 | 6.1  | [M+H] <sup>+</sup>                  |
| Cer:36:1      | 548.55 | 6.1  | [M-H <sub>2</sub> O+H] <sup>+</sup> |
| dhCer:36:0    | 568.57 | 6.7  | [M+H] <sup>+</sup>                  |
| dhCer:36:0    | 550.57 | 6.7  | [M-H <sub>2</sub> O+H] <sup>+</sup> |
| dhCer:35:0    | 552.55 | 5.45 | [M+H] <sup>+</sup>                  |
| dhCer:35:0    | 534.55 | 5.45 | [M-H <sub>2</sub> O+H] <sup>+</sup> |
| Cer:37:2      | 578.5  | 6    | [M+H] <sup>+</sup>                  |
| Cer:37:2      | 560.5  | 6    | [M-H <sub>2</sub> O+H] <sup>+</sup> |
| CerOH:37:3    | 592.5  | 4.9  | [M+H] <sup>+</sup>                  |
| CerOH:37:3    | 574.5  | 4.9  | [M-H <sub>2</sub> O+H] <sup>+</sup> |
| CerOH:37:2    | 594.5  | 5.3  | [M+H] <sup>+</sup>                  |
| CerOH:37:2    | 576.5  | 5.3  | [M-H <sub>2</sub> O+H] <sup>+</sup> |
| CerOH:36:1    | 582.6  | 5.45 | [M+H] <sup>+</sup>                  |
| CerOH:36:1    | 564.6  | 5.45 | [M-H <sub>2</sub> O+H] <sup>+</sup> |
| GlcCerOH:36:1 | 744.6  | 4.65 | [M+H] <sup>+</sup>                  |
| GlcCerOH:36:1 | 726.6  | 4.65 | [M-H <sub>2</sub> O+H] <sup>+</sup> |
| GlcCerOH:37:3 | 754.62 | 4    | [M+H] <sup>+</sup>                  |
| GlcCerOH:37:3 | 736.62 | 4    | [M-H <sub>2</sub> O+H] <sup>+</sup> |
| GlcCerOH:37:2 | 756.63 | 4.35 | [M+H] <sup>+</sup>                  |
| GlcCerOH:37:2 | 738.63 | 4.35 | [M-H <sub>2</sub> O+H] <sup>+</sup> |
| GlcCerOH:37:1 | 758.65 | 4.9  | [M+H] <sup>+</sup>                  |
| GlcCerOH:37:1 | 740.65 | 4.9  | [M-H <sub>2</sub> O+H] <sup>+</sup> |
| GlcCerOH:36:3 | 778.62 | 4    | [M+H] <sup>+</sup>                  |
| GlcCerOH:36:3 | 760.62 | 4    | [M-H <sub>2</sub> O+H] <sup>+</sup> |
| GlcCer:37:2   | 740.63 | 3.6  | [M+H] <sup>+</sup>                  |
| GlcCer:37:2   | 722.63 | 3.6  | [M-H <sub>2</sub> O+H] <sup>+</sup> |

|                |         |       |                                     |
|----------------|---------|-------|-------------------------------------|
| GlcCer:34:2    | 714.63  | 3     | [M+H] <sup>+</sup>                  |
| GlcCer:34:2    | 696.63  | 3     | [M-H <sub>2</sub> O+H] <sup>+</sup> |
| Cer:OH:42:0    | 684.6   | 9.8   | [M+H] <sup>+</sup>                  |
| Cer:OH:42:0    | 666.6   | 9.8   | [M-H <sub>2</sub> O+H] <sup>+</sup> |
| Cer:OH:41:0    | 670.6   | 9     | [M+H] <sup>+</sup>                  |
| Cer:OH:41:0    | 652.6   | 9     | [M-H <sub>2</sub> O+H] <sup>+</sup> |
| Cer:OH:40:0    | 656.6   | 8     | [M+H] <sup>+</sup>                  |
| CL:56:0 (ISTD) | 1241.85 | 14.3  | [M+H] <sup>+</sup>                  |
| CL:56:0 (ISTD) | 1258.88 | 14.3  | [M+Na] <sup>+</sup>                 |
| CL:68:7        | 1395.95 | 14.65 | [M+H] <sup>+</sup>                  |
| CL:68:7        | 1412.95 | 14.65 | [M+Na] <sup>+</sup>                 |
| CL:68:6        | 1398    | 15.7  | [M+H] <sup>+</sup>                  |
| CL:68:6        | 1415    | 15.7  | [M+Na] <sup>+</sup>                 |
| CL:68:5        | 1400    | 16.65 | [M+H] <sup>+</sup>                  |
| CL:68:5        | 1417    | 16.65 | [M+Na] <sup>+</sup>                 |
| CL:68:4        | 1402    | 17.65 | [M+H] <sup>+</sup>                  |
| CL:68:4        | 1419    | 17.65 | [M+Na] <sup>+</sup>                 |
| CL:68:3        | 1404    | 18.6  | [M+H] <sup>+</sup>                  |
| CL:68:3        | 1421    | 18.6  | [M+Na] <sup>+</sup>                 |
| CL:70:9        | 1420    | 13.8  | [M+H] <sup>+</sup>                  |
| CL:70:9        | 1437    | 13.8  | [M+Na] <sup>+</sup>                 |
| CL:70:8        | 1422    | 14.85 | [M+H] <sup>+</sup>                  |
| CL:70:8        | 1439    | 14.85 | [M+Na] <sup>+</sup>                 |
| CL:70:7        | 1424    | 15.9  | [M+H] <sup>+</sup>                  |
| CL:70:7        | 1441    | 15.9  | [M+Na] <sup>+</sup>                 |
| CL:70:6        | 1426    | 16.9  | [M+H] <sup>+</sup>                  |
| CL:70:6        | 1443    | 16.9  | [M+Na] <sup>+</sup>                 |
| CL:70:5        | 1428    | 17.9  | [M+H] <sup>+</sup>                  |
| CL:70:5        | 1445    | 17.9  | [M+Na] <sup>+</sup>                 |
| CL:70:4        | 1430    | 18.9  | [M+H] <sup>+</sup>                  |
| CL:70:4        | 1447    | 18.9  | [M+Na] <sup>+</sup>                 |
| CL:72:11       | 1444    | 12.95 | [M+H] <sup>+</sup>                  |
| CL:72:11       | 1461    | 12.95 | [M+Na] <sup>+</sup>                 |
| CL:72:10       | 1446    | 14    | [M+H] <sup>+</sup>                  |
| CL:72:10       | 1463    | 14    | [M+Na] <sup>+</sup>                 |

|              |        |       |                     |
|--------------|--------|-------|---------------------|
| CL:72:10     | 1448   | 15.05 | [M+H] <sup>+</sup>  |
| CL:72:9      | 1465   | 15.05 | [M+Na] <sup>+</sup> |
| CL:72:8      | 1450   | 16.05 | [M+H] <sup>+</sup>  |
| CL:72:8      | 1467   | 16.05 | [M+Na] <sup>+</sup> |
| CL:72:7      | 1452   | 17.15 | [M+H] <sup>+</sup>  |
| CL:72:7      | 1469   | 17.15 | [M+Na] <sup>+</sup> |
| CL:72:6      | 1454   | 18.1  | [M+H] <sup>+</sup>  |
| CL:72:6      | 1471   | 18.1  | [M+Na] <sup>+</sup> |
| CL:72:5      | 1456   | 19.05 | [M+H] <sup>+</sup>  |
| CL:72:5      | 1473   | 19.05 | [M+Na] <sup>+</sup> |
| MIPCdOH:40:0 | 1028.6 | 12.2  | [M+H] <sup>+</sup>  |
| MIPCdOH:40:1 | 1026.6 | 10.9  | [M+H] <sup>+</sup>  |
| MIPCdOH:40:2 | 1024.6 | 9.6   | [M+H] <sup>+</sup>  |
| MIPCdOH:42:0 | 1056.6 | 13.6  | [M+H] <sup>+</sup>  |
| MIPCdOH:42:1 | 1054.6 | 12.5  | [M+H] <sup>+</sup>  |
| MIPCdOH:42:2 | 1052.6 | 11.2  | [M+H] <sup>+</sup>  |
| MIPCdOH:42:3 | 1050.6 | 10    | [M+H] <sup>+</sup>  |
| MIPCdOH:42:4 | 1048.6 | 8.8   | [M+H] <sup>+</sup>  |

**Table S4. Genes coding for enzymes involved in GlcCer pathway of *N. crassa*.**

| <b>Gene ID &amp; name</b> | <b>Open reading frame (ORF)</b> | <b>Number of introns</b>    | <b>Chromosome</b> | <b>Protein product</b> |
|---------------------------|---------------------------------|-----------------------------|-------------------|------------------------|
| NCU02468<br><i>Δlac</i>   | 1809 bp                         | 3<br>length: 75, 139, 69 bp | 1                 | 509 aa                 |
| NCU08927<br><i>Δdes-1</i> | 1384 bp                         | 2<br>length: 73, 93 bp      | 5                 | 406 aa                 |
| NCU02408<br><i>Δdes-2</i> | 2007 bp                         | 1<br>length: 131 bp         | 7                 | 625 aa                 |
| NCU07859<br><i>Δsmt</i>   | 1817 bp                         | 3<br>length: 109, 74, 60 bp | 3                 | 525 aa                 |
| NCU01116<br><i>Δgcs</i>   | 1735 bp                         | 1<br>length: 96 bp          | 5                 | 546 aa                 |

**Table S5. Oligonucleotides used in this study for PCR.**

| Primer                | Sequence 5'-3'           | Gene                    | Product length       |
|-----------------------|--------------------------|-------------------------|----------------------|
| hygRvf_3f             | CGACAGACGTCGCGGTGAGTTCAG | <i>hyg</i>              |                      |
| LAC-1vf_3r            | CTCCAGTTGTAGTATGGTGC     | $\Delta lac$            | 1576 bp <sup>a</sup> |
| FGSC#15707_3r         | GAATCACGGAATGTACGAGG     | $\Delta des-1$          | 1424 bp <sup>a</sup> |
| FGSC#16221_3r         | TGGTAGACGTATGGTGTAGC     | $\Delta des-2$          | 1451 bp <sup>a</sup> |
| FGSC#13992_3r         | CTAGAGCCATGATCAACAGC     | $\Delta smt$            | 1418 bp <sup>a</sup> |
| GCSvf_3r              | TCTCCTATCCCTCGTGAAGC     | $\Delta gcs$            | 1499 bp <sup>a</sup> |
| Lac_fw_outs_flank 5'  | CGTCCATCTTGCCGTCGTAC     | $\Delta lac$            | 3696 bp <sup>b</sup> |
| 15707_fw_outs_flank5' | GGGTGACTGGACAAGAAACG     | $\Delta des-1$          | 3528 bp <sup>b</sup> |
| 16221_fw_outs_flank5' | GAGCAGGAACTCAAGAAGGC     | $\Delta des-2$          | 3736 bp <sup>b</sup> |
| 13992_fw_outs_flank5' | CGTTGGGTAATGGTATGGG      | $\Delta smt$            | 3603 bp <sup>b</sup> |
| GCS_fw_outs_flank5'   | GGATGTCAGCAATGTCAACCG    | $\Delta gcs$            | 3786 bp <sup>b</sup> |
| Smt northern_rev      | ATGTCGGAGTCGCATAGCGTC    | <i>smt</i> <sup>c</sup> |                      |
| Smt northern_fw       | GATCAGGCCATAAGTGAAGCG    | <i>smt</i> <sup>c</sup> |                      |

<sup>a</sup>PCR product length resulting from combining the *hygR*-specific oligonucleotide hygR\_3f with oligonucleotide specific for the 3'UTR region of the replaced gene.

<sup>b</sup>PCR product length resulting from combining the oligonucleotide specific for the 3'UTR of the respective gene with the oligonucleotide specific for the 5'UTR region outside of the replaced gene.

<sup>c</sup>Oligonucleotides used for generating the *smt*-specific DIG-labelled hybridization probe for Northern blot analysis.

Supplementary Figures

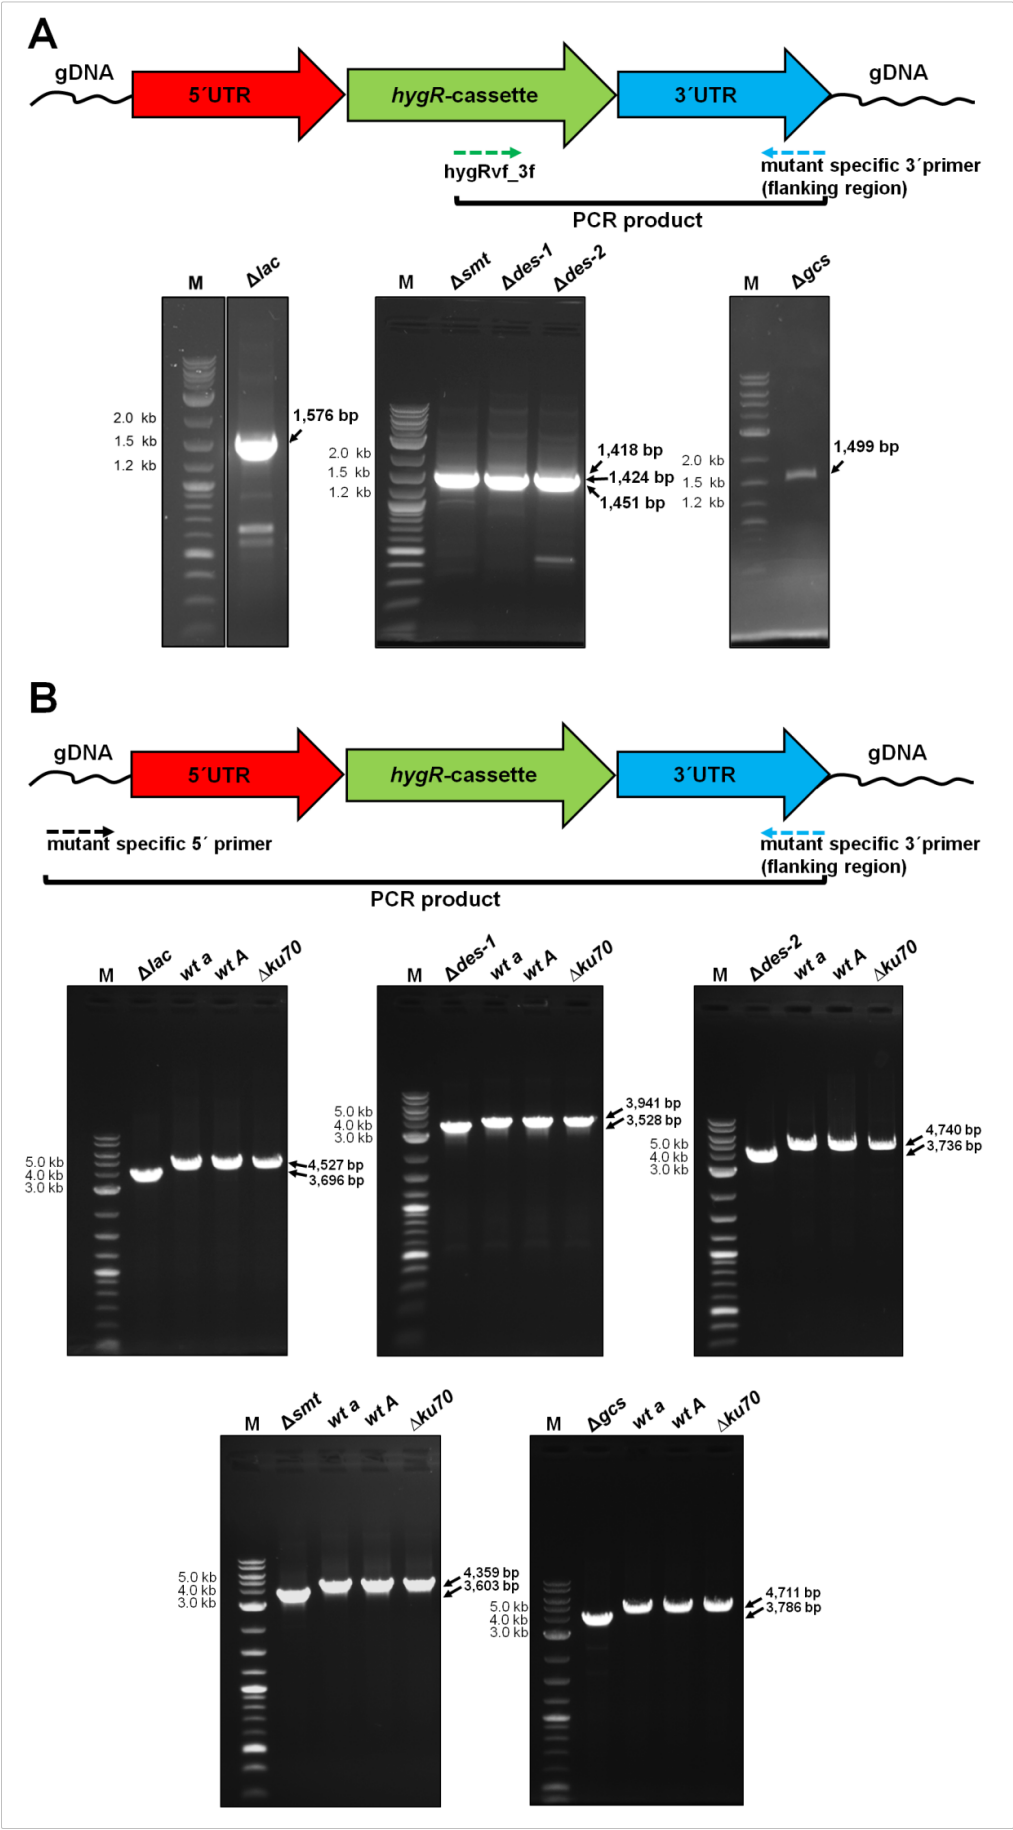



**Figure S1. Verification of *N. crassa* knockout mutants with PCR.** (A) **Top:** Scheme to visualize the presence of the *hygR* cassette in the mutants: gene specific 5'-UTR and 3'-UTR region (red and blue arrows) and *hygR* coding sequence (green arrow); *hygRvf\_3f* primer (green dashed arrow) and mutant specific 3'-primers (blue dashed arrow) as listed in Supplementary Table S5; *N. crassa* genome (black wavy lines); PCR product with the expected size (black). **Bottom:** Agarose (1.0 % (w/v)) gel electrophoresis for PCR product analysis. A 2-log size marker (New England Biolabs) was used.

(B) **Top:** Scheme to visualize the site-specific integration of the *hygR* cassette in the mutants: gene specific 5'-UTR and 3'-UTR region (red and blue arrows) and *hygR* coding sequence (green arrow); mutant specific\_5f primers (black dashed arrow) and mutant specific\_3r primers (blue dashed arrow) as listed in Supplementary Table S5. The *wt* and the  $\Delta ku70$  strain served as controls. **Bottom:** Agarose (1.0 % (w/v)) gel electrophoresis for PCR product analysis. A 2-log size marker (New England Biolabs) was used.

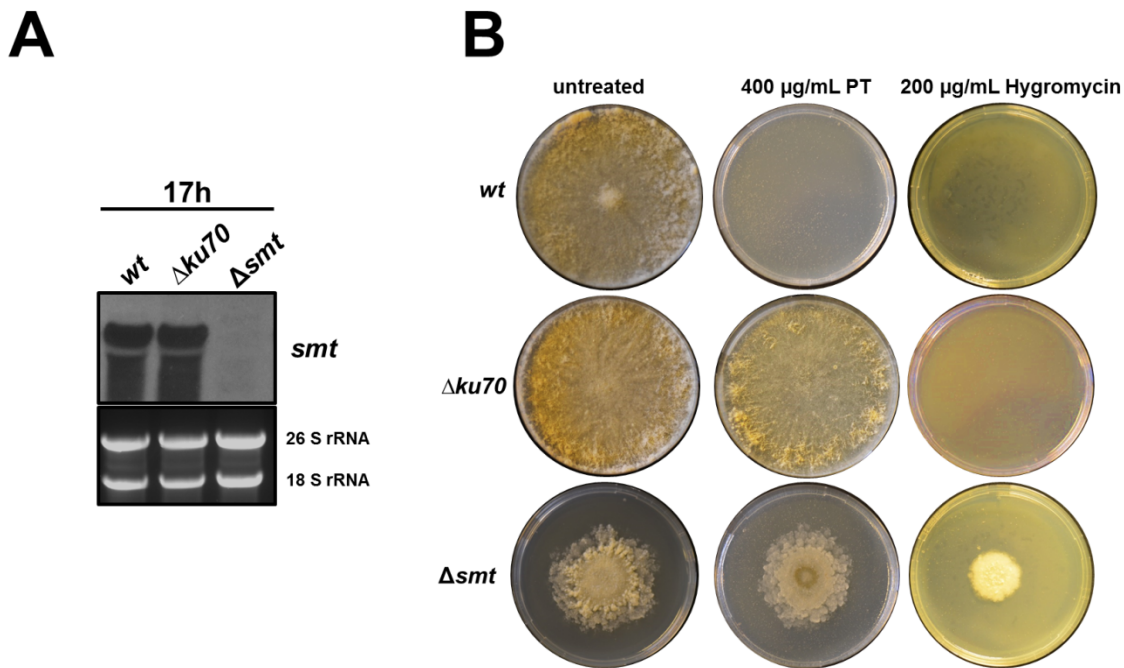

**Figure S2. Verification of the *N. crassa smt* deletion strain.** (A) Expression of *smt* in 17 h-old submerge cultures of *N. crassa* wt,  $\Delta ku70$  and  $\Delta smt$ . Ten  $\mu$ g of total RNA was loaded per lane on a 1.2% denaturing agarose gel, blotted and hybridized with an *smt*-specific DIG-labelled probe. Ethidium bromide-stained 26S and 18S rRNA is shown as loading control. (B) Growth of *N. crassa* strains wt,  $\Delta ku70$  and  $\Delta smt$  on solid medium supplemented with 400  $\mu$ g/mL PT or 200  $\mu$ g/mL hygromycin.

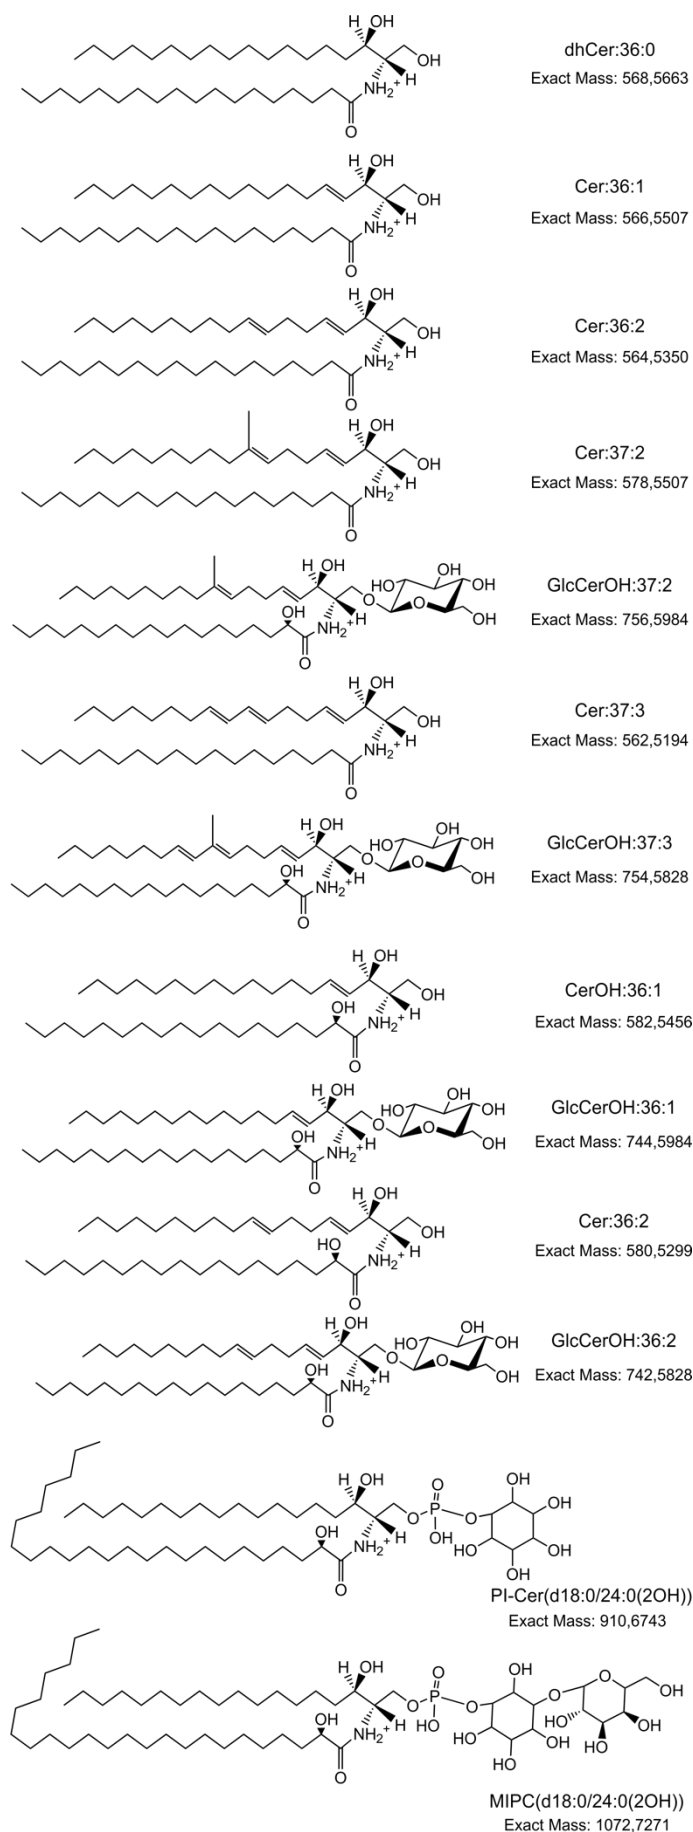

**Figure S3. Putative structures of identified ceramide and GlcCer species in *N. crassa*.** Structures were plotted with ChemBioDraw (ChemBioOffice).

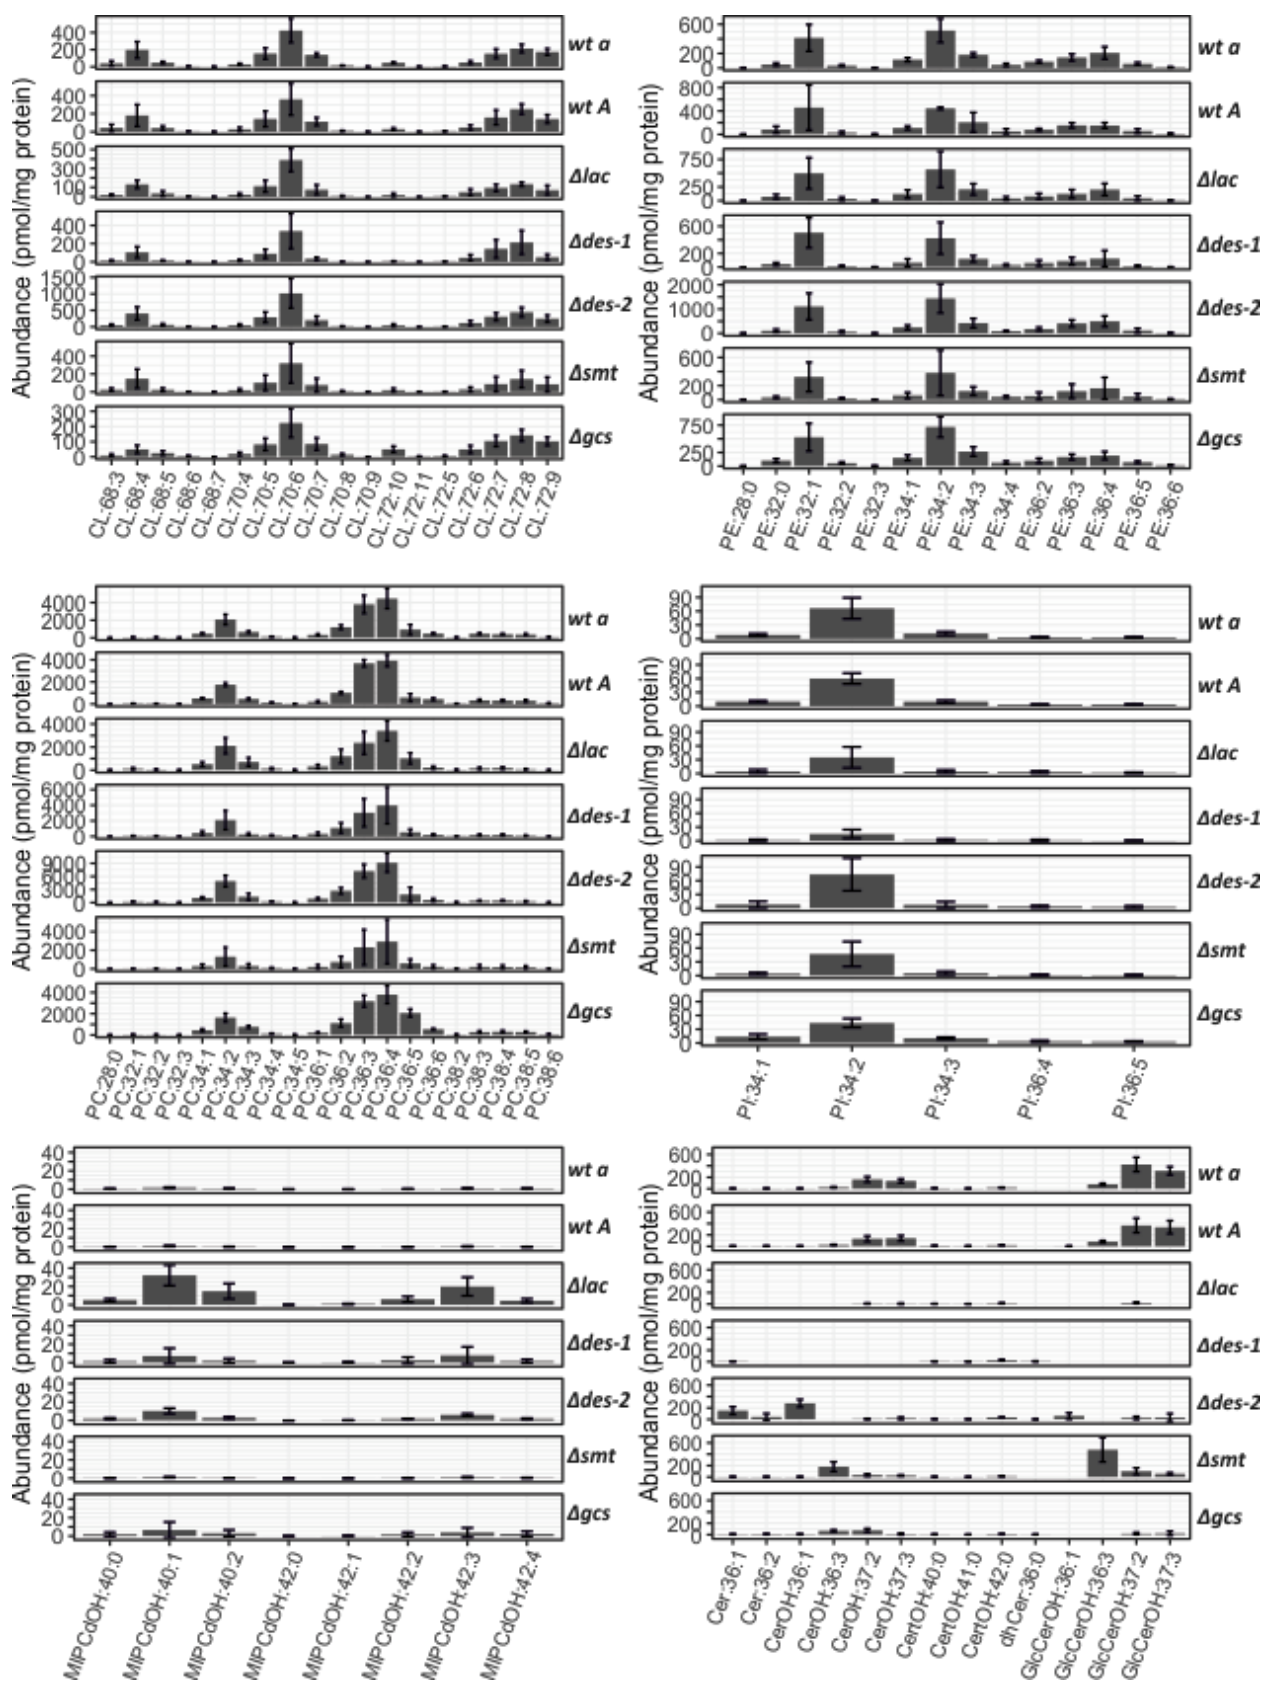

**Figure S4. Abundance of ceramide and GlcCer species and other lipid classes in *N. crassa* wt and GlcCer depletion mutants.** Phosphatidylcholines (PC), phosphatidylethanolamines (PE), phosphatidylinositols (PI) and cardiolipins (CL), mannosylinositol phosphorylceramides (MIPC), ceramides (Cer), glucosylceramides (GlcCer). Values are given as mean  $\pm$  SD (n=3).

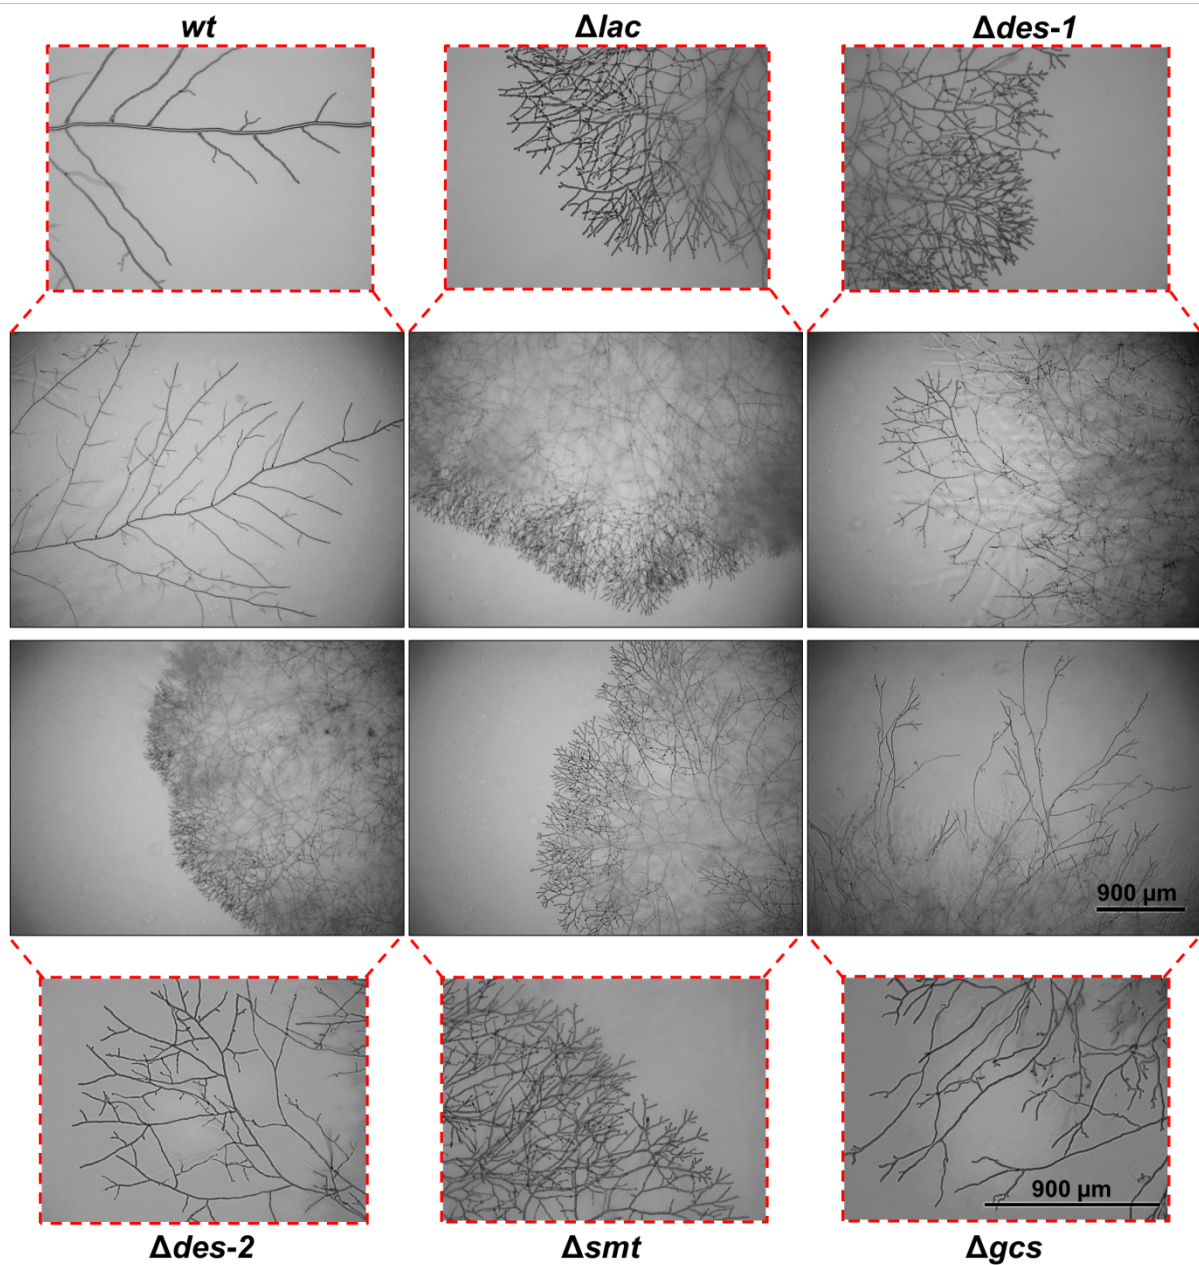

**Figure S5. Hyphal morphology of *GlcCer* depletion strains grown on solid medium.** Conidia were point inoculated on Vogel's agar and grown for 24 h at 25°C before imaging the colony edge. The *wt* served as a reference.



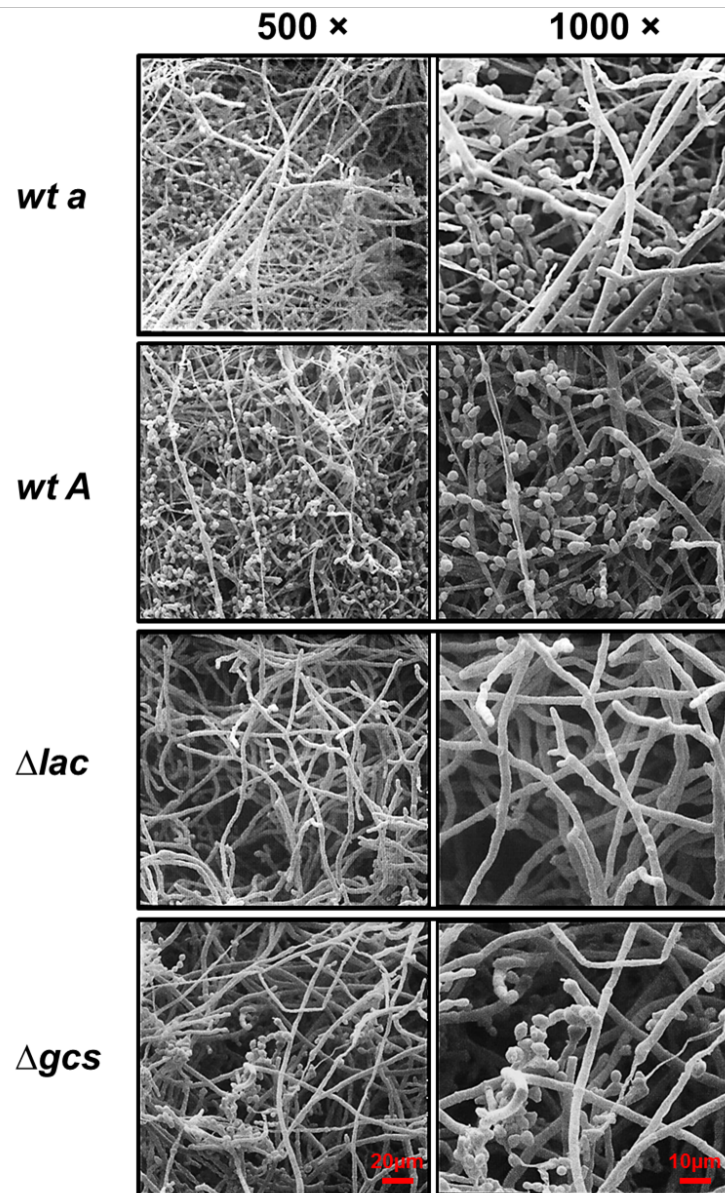

**Figure S6. Scanning electron microscopy of *N. crassa* *wt*,  $\Delta lac$  and  $\Delta gcs$  grown on solid medium.** Conidia of the *wt*,  $\Delta lac$  and  $\Delta gcs$  were inoculated on Vogel's agar and incubated for 72 h at 25°C. Samples were analysed by SEM and aerial hyphae were depicted in magnification of 500 × and 1.000 ×.

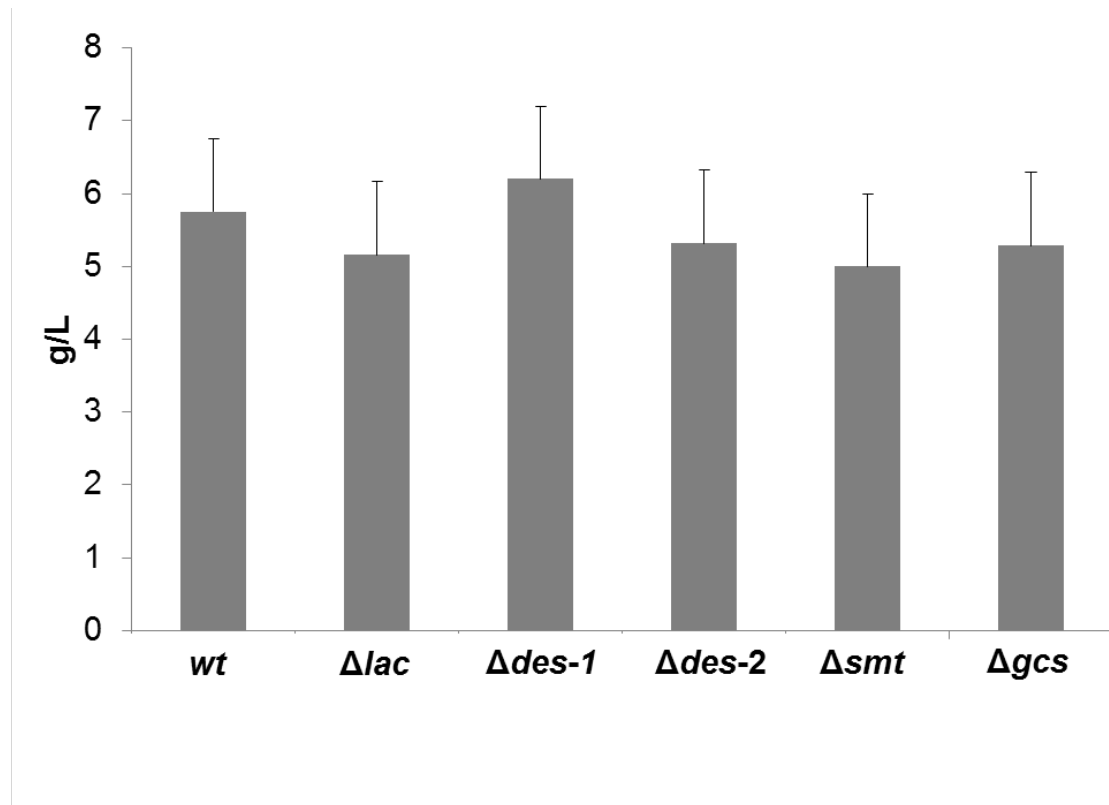

**Figure S7. Impact of GlcCer depletion on fungal biomass.** Strains were cultivated in liquid Vogel's medium at 25°C for 72 h. Biomass is indicated as dry weight in gram per liter (g/L). Values are given as mean  $\pm$  SD (n=3).

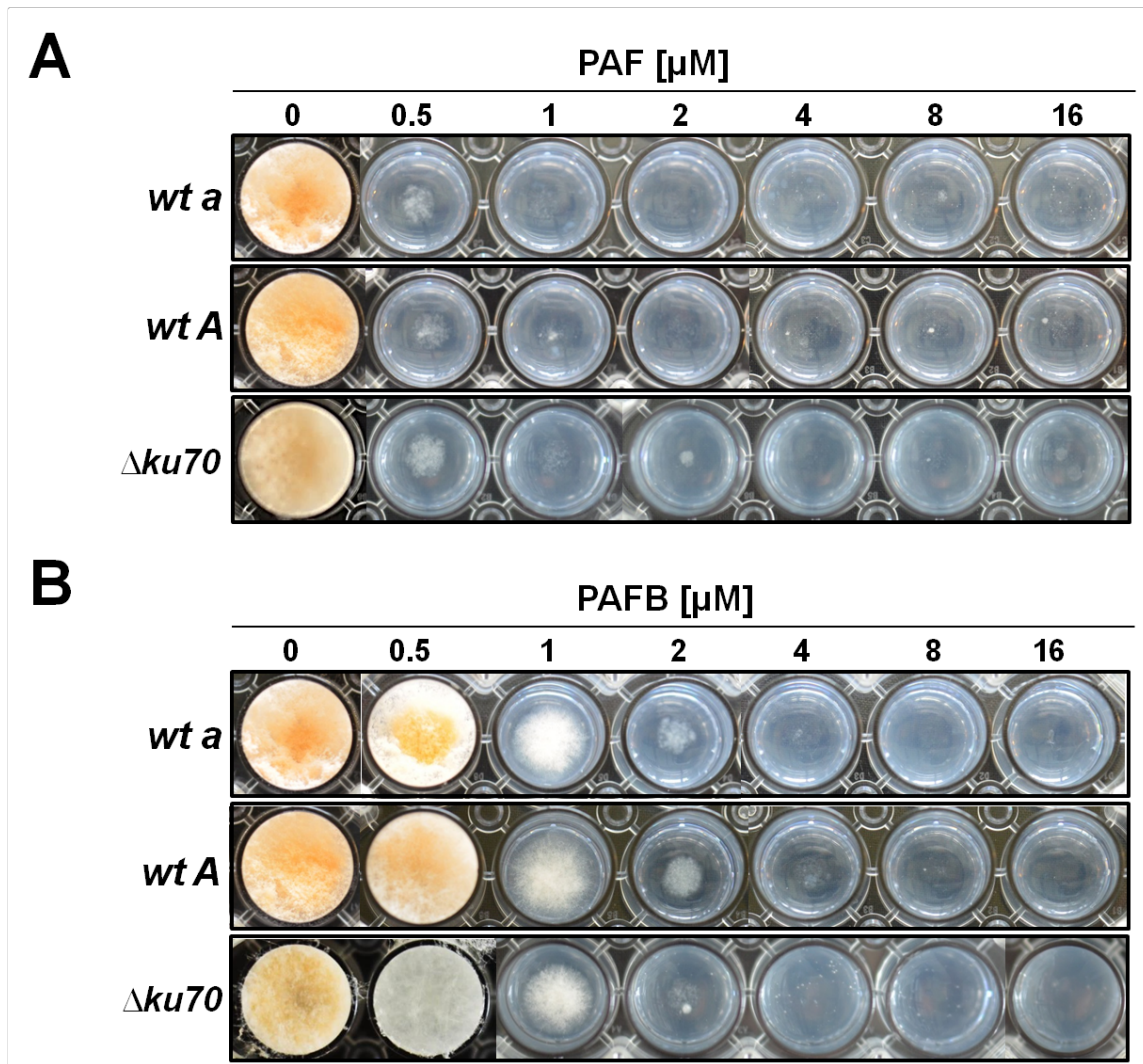

**Figure S8. Growth of the *N. crassa* *wt* and  $\Delta ku70$  strain in the presence of (A) PAF and (B) PAFB.** Conidia were point inoculated on Vogel's agar with increasing protein concentrations (0-16  $\mu\text{M}$ ) and incubated for 72 h at 25°C.



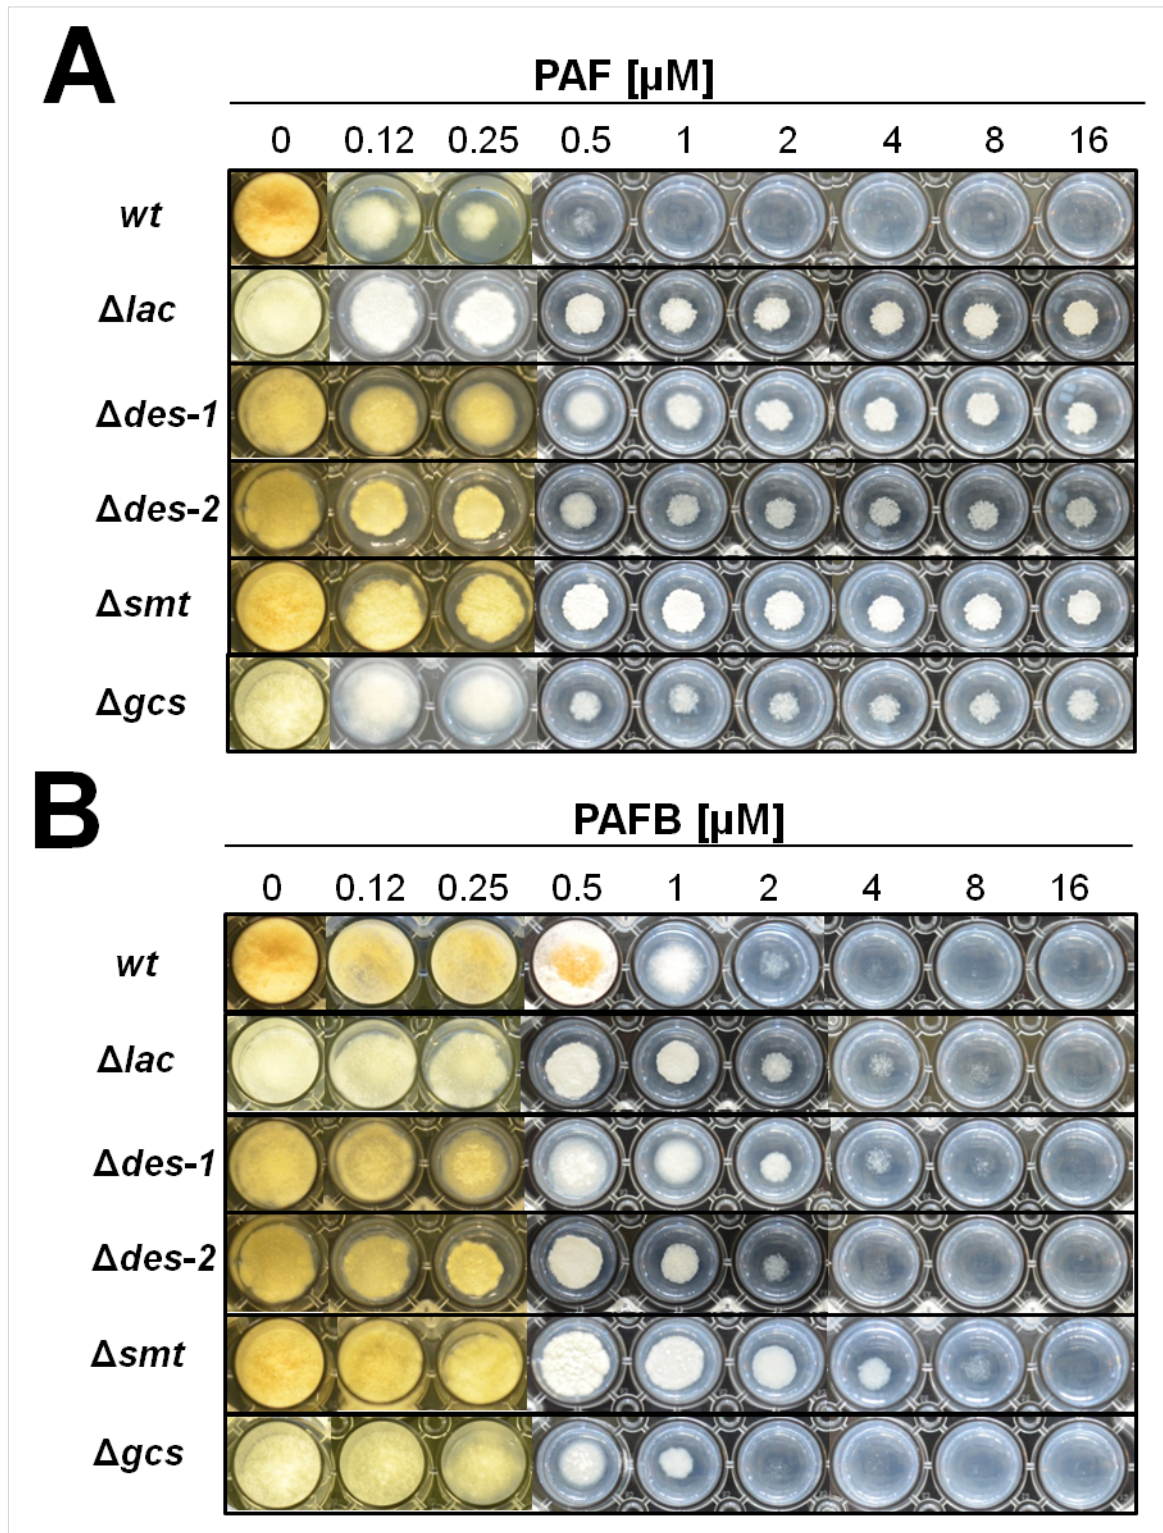

**Figure S9. Susceptibility of GlcCer depletion mutants towards PAF and PAFB on solid medium.** Conidia were point inoculated in the presence of increasing (A) PAF (0-16  $\mu$ M) or (B) PAFB (0-16  $\mu$ M) concentrations for 30 h at 25°C. The *wt* strain was used as control.

## Supplementary References

- Cheng, Y. S., Zheng, Y. and VanderGheynst, J. S. (2011). Rapid quantitative analysis of lipids using a colorimetric method in a microplate format. *Lipids* **46**(1): 95-103. doi:[10.1007/s11745-010-3494-0](https://doi.org/10.1007/s11745-010-3494-0).
- Park, G., Colot, H. V., Collopy, P. D., Krystofova, S., Crew, C., Ringelberg, C., Litvinkova, L., Altamirano, L., Li, L., Curilla, S., Wang, W., Gorrochotegui-Escalante, N., Dunlap, J. C. and Borkovich, A. (2011). High-throughput production of gene replacement mutants in *Neurospora crassa*. *Methods Mol. Biol.* **722**: 179-189, doi:[10.1007/978-1-61779-040-9\\_13](https://doi.org/10.1007/978-1-61779-040-9_13).
- Zadra, I., Abt, B., Parson, W. and Haas, H. (2000). *XylP* promoter-based expression system and its use for antisense downregulation of the *Penicillium chrysogenum* nitrogen regulator NRE. *Appl. Environ. Microbiol.* **66**(11): 4810-4816. doi:[10.1128/AEM.66.11.4810-4816.2000](https://doi.org/10.1128/AEM.66.11.4810-4816.2000).
